# Supplementary material for: Landscape-scale spatial variability of blue carbon stocks and fluxes in tropical seagrass meadows
Source: Copernicus journal article supplement (doi:10.5194/egusphere-2025-6519), 2026-01-06
Supplement: Supplementary file 1 [file egusphere-2025-6519-supplement.pdf]

## Electronic Supplemental Material

Naima Iram<sup>1\*</sup>, Kiah Eng Lim<sup>2</sup>, M Ariq Khalingga<sup>1</sup>, Pierre Taillardat,<sup>3</sup> Sheryl Chan Si Ern<sup>1</sup>, Lian Pin Koh<sup>1\*\*</sup>, Daniel A. Friess<sup>4</sup>

\*Corresponding author: n.iram@nus.edu.sg

\*\*Co-Corresponding author: lianpinkoh@nus.edu.sg

List of contents

Figure S1: Spearman rank correlation between organic carbon stock and soil temperature.

Figure S2: Spearman rank correlation between organic carbon stock and salinity

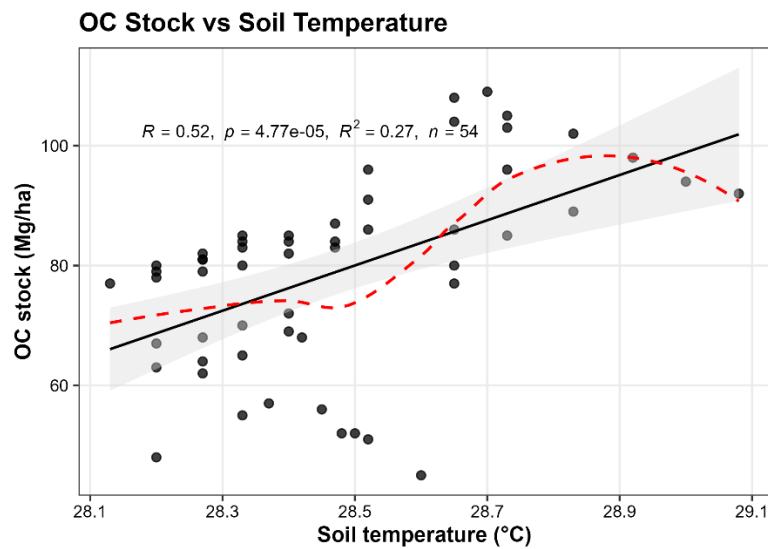

*Figure S 1. Correlation between organic carbon stock and soil temperature.*

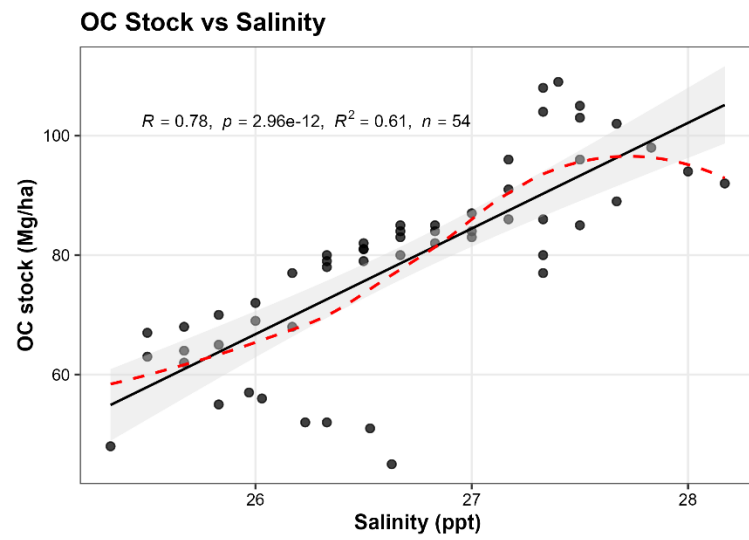

Figure S 2. Correlation between organic carbon stock and salinity
