# Supplementary material for: Landscape-scale spatial variability of blue carbon stocks and fluxes in tropical seagrass meadows
Source: Copernicus journal article supplement (doi:10.5194/egusphere-2025-6519), 2026-01-06
Supplement: Supplementary file [file egusphere-2025-6519-AC2-supplement.pdf]

# Electronic Supplemental Material

Naima Iram<sup>1\*</sup>, Kiah Eng Lim<sup>2</sup>, M Ariq Khalingga<sup>1</sup>, Pierre Taillardat,<sup>3</sup> Sheryl Chan Si Ern<sup>1</sup>, Lian Pin Koh<sup>1\*\*</sup>, Daniel A. Friess<sup>4</sup>

\*Corresponding author: n.iram@nus.edu.sg

\*\*Co-Corresponding author: lianpinkoh@nus.edu.sg

## List of contents

**Table S1. Seagrass cover and species and study site coordinates**

**Table S2. Site-level variability, refusal depth, and variance partitioning (Excel workbook)**

Table S2 is provided as an Excel workbook: **Table S2. Site-level variability, refusal depth, and variance partitioning.xlsx**. It contains the following sheets:

1. Site pairwise contrasts (Tukey-adjusted) for stocks and fluxes.
2. Site estimated marginal means ( $\pm$ SE; 95% CI) with compact letter displays and sample sizes (N) for complete-to-25 cores and flux plots.
3. Refusal depth (cm) summaries by site and geomorphology, plus mixed-model outputs testing geomorphology effects on refusal depth and a summary of the proportion of cores reaching 100 cm and  $\geq$ 80 cm.
4. Variance partitioning outputs (variance components and % of total variance) for stocks (0–25 cm, complete-to-25), CO<sub>2</sub> (geomorphology-only model), and CH<sub>4</sub> (stable site/plot model).

**Table S3.** Summary of sediment properties in the upper 0–25 cm (dry bulk density and mud fraction) by site and geomorphology

**Table S4.** Summary of plot-level environmental parameters by site and geomorphology (mean  $\pm$  SD; min–max; n plots).

**Figure S1.** Soil properties in the upper 0–25 cm (dry bulk density and mud fraction) across sites.

**Figure S2.** Plot-level environmental parameters across sites (redox, pH, salinity, water temperature, dissolved oxygen, conductivity).

Table S 1. Seagrass species and cover (mean  $\pm$  SD) at study site location

| Study site              | Longitude  | Latitude | All species present                                                                 | Dominant seagrass species | Seagrass genus | Seagrass cover (%) |
|-------------------------|------------|----------|-------------------------------------------------------------------------------------|---------------------------|----------------|--------------------|
| Changi Beach Park       | 104.00212  | 1.38461  | Halophila, Ruppia sp.                                                               | Halophila ovalis          | Halophila sp.  | 47.00 $\pm$ 19.24  |
| Chek Jawa               | 103.99102  | 1.4104   | Halophila, Ruppia sp., Halodule, Zostera, Heterozostera, Syringodium, Cymodocea sp. | Halophila ovalis          | Halophila sp.  | 80.15 $\pm$ 12.53  |
| Tanah Merah             | 103.98373  | 1.31677  | Amphibolis, Thalassia, Phyllospadix, Posidonia, Enhalus sp.                         | Thalassia hemprichii      | Thalassia sp.  | 53.75 $\pm$ 20.66  |
| Eagle Bay               | 103.8545   | 1.229    | Amphibolis, Thalassia, Phyllospadix, Posidonia, Enhalus sp.                         | Thalassia hemprichii      | Thalassia sp.  | 70.00 $\pm$ 23.58  |
| Cyrene Reef             | 103.755458 | 1.259039 | Halodule, Zostera, Heterozostera, Syringodium, Cymodocea sp.                        | Cymodocea rotundata       | Cymodocea sp.  | 27.25 $\pm$ 23.09  |
| Labrador Nature Reserve | 103.800937 | 1.266452 | Halodule, Zostera, Heterozostera, Syringodium, Cymodocea sp.                        | Cymodocea rotundata       | Cymodocea sp.  | 81.67 $\pm$ 5.59   |

Species presence and dominant species were compiled from field observations and site records, and seagrass cover values were compiled from literature (Alemu et al., 2022)

**Table S3**

**Table S3.** Summary of sediment properties in the upper 0–25 cm (dry bulk density and mud fraction) by site (a) and geomorphology (b; mean  $\pm$  SD; min–max; n cores). Values are calculated from depth-resolved measurements aggregated within 0–25 cm. Units used: stocks in Mg Corg ha<sup>-1</sup>, CO<sub>2</sub> in mg m<sup>-2</sup> h<sup>-1</sup>, CH<sub>4</sub> in  $\mu$ g m<sup>-2</sup> h<sup>-1</sup>, refusal depth in cm, conductivity in mS/cm, dissolved oxygen in % saturation.

| site id | geomorphology   | variable                                        | n  | mean $\pm$ SD       | min max       |
|---------|-----------------|-------------------------------------------------|----|---------------------|---------------|
| CBP     | Estuarine       | Dry bulk density (g cm <sup>-3</sup> ), 0-25 cm | 11 | 1.486 $\pm$ 0.080   | 1.375-1.627   |
| CJ      | Estuarine       | Dry bulk density (g cm <sup>-3</sup> ), 0-25 cm | 15 | 1.280 $\pm$ 0.190   | 1.007-1.499   |
| CR      | Reef-associated | Dry bulk density (g cm <sup>-3</sup> ), 0-25 cm | 9  | 1.404 $\pm$ 0.181   | 1.014-1.570   |
| EB      | Lagoonal        | Dry bulk density (g cm <sup>-3</sup> ), 0-25 cm | 9  | 1.553 $\pm$ 0.113   | 1.344-1.744   |
| LNR     | Reef-associated | Dry bulk density (g cm <sup>-3</sup> ), 0-25 cm | 9  | 1.151 $\pm$ 0.242   | 0.850-1.507   |
| TM      | Lagoonal        | Dry bulk density (g cm <sup>-3</sup> ), 0-25 cm | 9  | 1.238 $\pm$ 0.152   | 0.993-1.454   |
| CBP     | Estuarine       | % mud, 0-25 cm                                  | 11 | 68.266 $\pm$ 21.527 | 30.387-97.901 |
| CJ      | Estuarine       | % mud, 0-25 cm                                  | 15 | 22.073 $\pm$ 10.868 | 7.202-42.021  |
| CR      | Reef-associated | % mud, 0-25 cm                                  | 9  | 11.652 $\pm$ 4.660  | 5.895-17.095  |
| EB      | Lagoonal        | % mud, 0-25 cm                                  | 9  | 5.135 $\pm$ 1.515   | 2.497-7.652   |
| LNR     | Reef-associated | % mud, 0-25 cm                                  | 9  | 21.599 $\pm$ 5.129  | 13.923-29.030 |
| TM      | Lagoonal        | % mud, 0-25 cm                                  | 9  | 9.996 $\pm$ 2.825   | 5.689-15.843  |

| geomorphology   | variable                           | n  | mean $\pm$ SD       | min_max      |
|-----------------|------------------------------------|----|---------------------|--------------|
| Estuarine       | Dry bulk density (g cm-3), 0-25 cm | 26 | 1.367 $\pm$ 0.183   | 1.007-1.627  |
| Lagoonal        | Dry bulk density (g cm-3), 0-25 cm | 18 | 1.396 $\pm$ 0.208   | 0.993-1.744  |
| Reef-associated | Dry bulk density (g cm-3), 0-25 cm | 18 | 1.278 $\pm$ 0.245   | 0.850-1.570  |
| Estuarine       | % mud, 0-25 cm                     | 26 | 41.616 $\pm$ 28.163 | 7.202-97.901 |
| Lagoonal        | % mud, 0-25 cm                     | 18 | 7.565 $\pm$ 3.330   | 2.497-15.843 |
| Reef-associated | % mud, 0-25 cm                     | 18 | 16.626 $\pm$ 6.985  | 5.895-29.030 |

**Table S4**

**Table S4.** Summary of plot-level environmental parameters by site and geomorphology (mean  $\pm$  SD; min–max; n plots). Values are computed as plot means of low-tide measurements.

| site_id | geomorphology   | variable       | n | mean $\pm$ SD         | min_max         |
|---------|-----------------|----------------|---|-----------------------|-----------------|
| CBP     | Estuarine       | Redox (mV)     | 9 | -91.648 $\pm$ 219.160 | -396.500-59.600 |
| CJ      | Estuarine       | Redox (mV)     | 9 | 65.204 $\pm$ 9.344    | 52.767-86.733   |
| CR      | Reef-associated | Redox (mV)     | 9 | 156.704 $\pm$ 43.087  | 107.300-208.460 |
| EB      | Lagoonal        | Redox (mV)     | 9 | 74.752 $\pm$ 14.301   | 56.000-100.667  |
| LNR     | Reef-associated | Redox (mV)     | 9 | 44.967 $\pm$ 4.657    | 41.533-56.333   |
| TM      | Lagoonal        | Redox (mV)     | 9 | 151.863 $\pm$ 11.501  | 139.000-164.700 |
| CBP     | Estuarine       | pH             | 9 | 7.889 $\pm$ 0.253     | 7.533-8.190     |
| CJ      | Estuarine       | pH             | 9 | 7.733 $\pm$ 0.374     | 7.467-8.340     |
| CR      | Reef-associated | pH             | 9 | 7.067 $\pm$ 0.447     | 6.570-7.675     |
| EB      | Lagoonal        | pH             | 9 | 7.725 $\pm$ 0.707     | 6.000-8.250     |
| LNR     | Reef-associated | pH             | 9 | 6.907 $\pm$ 0.480     | 6.580-7.633     |
| TM      | Lagoonal        | pH             | 9 | 7.081 $\pm$ 0.115     | 6.940-7.193     |
| CBP     | Estuarine       | Salinity (psu) | 9 | 30.359 $\pm$ 2.103    | 25.003-32.113   |
| CJ      | Estuarine       | Salinity (psu) | 9 | 29.882 $\pm$ 0.613    | 28.467-30.467   |
| CR      | Reef-associated | Salinity (psu) | 9 | 30.057 $\pm$ 1.381    | 28.016-31.820   |

|     |                 |                                 |   |                  |                |
|-----|-----------------|---------------------------------|---|------------------|----------------|
| EB  | Lagoonal        | Salinity (psu)                  | 9 | 30.236 ± 1.196   | 28.730-32.170  |
| LNR | Reef-associated | Salinity (psu)                  | 9 | 31.350 ± 0.505   | 30.497-32.183  |
| TM  | Lagoonal        | Salinity (psu)                  | 9 | 22.475 ± 2.613   | 19.450-26.133  |
| CBP | Estuarine       | Water temperature (°C)          | 9 | 30.092 ± 1.132   | 28.693-32.077  |
| CJ  | Estuarine       | Water temperature (°C)          | 9 | 30.115 ± 2.738   | 28.100-34.113  |
| CR  | Reef-associated | Water temperature (°C)          | 9 | 27.478 ± 0.249   | 26.950-27.696  |
| EB  | Lagoonal        | Water temperature (°C)          | 9 | 29.954 ± 1.327   | 28.160-31.680  |
| LNR | Reef-associated | Water temperature (°C)          | 9 | 28.984 ± 0.336   | 28.467-29.340  |
| TM  | Lagoonal        | Water temperature (°C)          | 9 | 28.367 ± 0.166   | 28.187-28.653  |
| CBP | Estuarine       | Dissolved oxygen (% saturation) | 9 | 105.711 ± 27.700 | 75.500-156.333 |
| CJ  | Estuarine       | Dissolved oxygen (% saturation) | 9 | 67.322 ± 34.357  | 39.000-140.000 |
| CR  | Reef-associated | Dissolved oxygen (% saturation) | 9 | 56.353 ± 9.962   | 43.100-70.630  |
| EB  | Lagoonal        | Dissolved oxygen (% saturation) | 9 | 34.922 ± 2.862   | 29.900-39.667  |
| LNR | Reef-associated | Dissolved oxygen (% saturation) | 9 | 54.204 ± 21.802  | 41.933-107.000 |
| TM  | Lagoonal        | Dissolved oxygen (% saturation) | 9 | 42.193 ± 14.311  | 24.633-57.900  |
| CBP | Estuarine       | Conductivity (mS/cm)            | 9 | 48.261 ± 8.170   | 37.963-62.100  |
| CJ  | Estuarine       | Conductivity (mS/cm)            | 9 | 46.818 ± 4.219   | 40.267-54.067  |
| CR  | Reef-associated | Conductivity (mS/cm)            | 9 | 43.702 ± 5.167   | 33.644-48.840  |
| EB  | Lagoonal        | Conductivity (mS/cm)            | 9 | 47.027 ± 4.765   | 42.233-55.410  |
| LNR | Reef-associated | Conductivity (mS/cm)            | 9 | 46.973 ± 2.761   | 41.147-49.410  |
| TM  | Lagoonal        | Conductivity (mS/cm)            | 9 | 33.416 ± 4.265   | 28.793-40.910  |

| geomorphology   | variable                          | n  | mean $\pm$ SD         | min_max         |
|-----------------|-----------------------------------|----|-----------------------|-----------------|
| Estuarine       | Redox (mV)                        | 18 | -13.222 $\pm$ 170.752 | -396.500-86.733 |
| Lagoonal        | Redox (mV)                        | 18 | 113.307 $\pm$ 41.623  | 56.000-164.700  |
| Reef-associated | Redox (mV)                        | 18 | 100.835 $\pm$ 64.721  | 41.533-208.460  |
| Estuarine       | pH                                | 18 | 7.811 $\pm$ 0.320     | 7.467-8.340     |
| Lagoonal        | pH                                | 18 | 7.403 $\pm$ 0.593     | 6.000-8.250     |
| Reef-associated | pH                                | 18 | 6.987 $\pm$ 0.457     | 6.570-7.675     |
| Estuarine       | Salinity (psu)                    | 18 | 30.121 $\pm$ 1.523    | 25.003-32.113   |
| Lagoonal        | Salinity (psu)                    | 18 | 26.355 $\pm$ 4.453    | 19.450-32.170   |
| Reef-associated | Salinity (psu)                    | 18 | 30.703 $\pm$ 1.209    | 28.016-32.183   |
| Estuarine       | Water temperature ( $^{\circ}$ C) | 18 | 30.103 $\pm$ 2.032    | 28.100-34.113   |
| Lagoonal        | Water temperature ( $^{\circ}$ C) | 18 | 29.161 $\pm$ 1.228    | 28.160-31.680   |
| Reef-associated | Water temperature ( $^{\circ}$ C) | 18 | 28.231 $\pm$ 0.826    | 26.950-29.340   |
| Estuarine       | Dissolved oxygen (% saturation)   | 18 | 86.517 $\pm$ 36.148   | 39.000-156.333  |
| Lagoonal        | Dissolved oxygen (% saturation)   | 18 | 38.557 $\pm$ 10.688   | 24.633-57.900   |
| Reef-associated | Dissolved oxygen (% saturation)   | 18 | 55.279 $\pm$ 16.481   | 41.933-107.000  |
| Estuarine       | Conductivity (mS/cm)              | 18 | 47.540 $\pm$ 6.351    | 37.963-62.100   |
| Lagoonal        | Conductivity (mS/cm)              | 18 | 40.221 $\pm$ 8.264    | 28.793-55.410   |
| Reef-associated | Conductivity (mS/cm)              | 18 | 45.337 $\pm$ 4.357    | 33.644-49.410   |

Figure S1

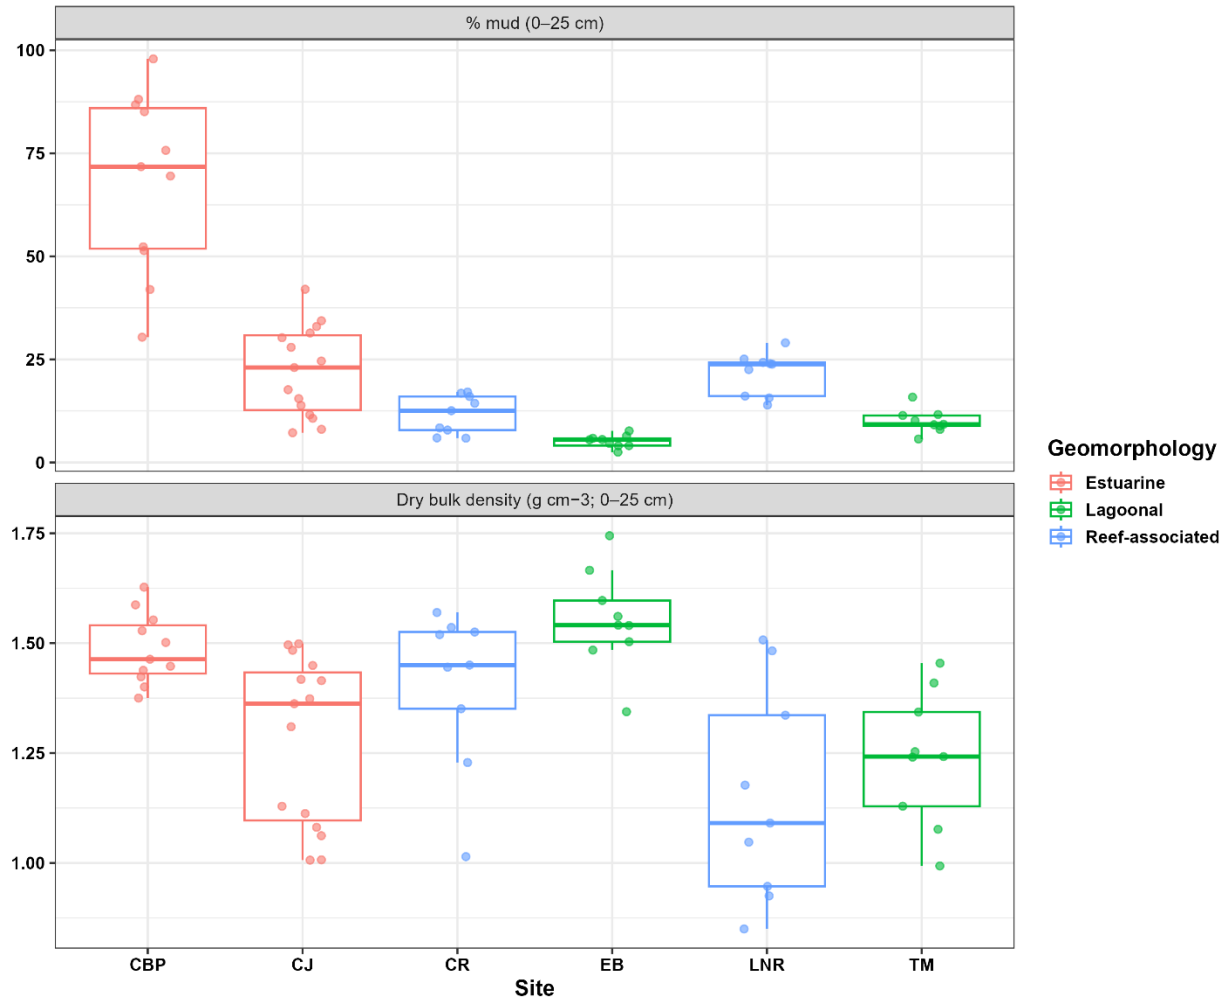

Figure S 1. Soil properties in the upper 0–25 cm (dry bulk density and mud fraction) across sites. Boxplots show distributions of core-level 0–25 cm means; points show individual cores colored by geomorphology.

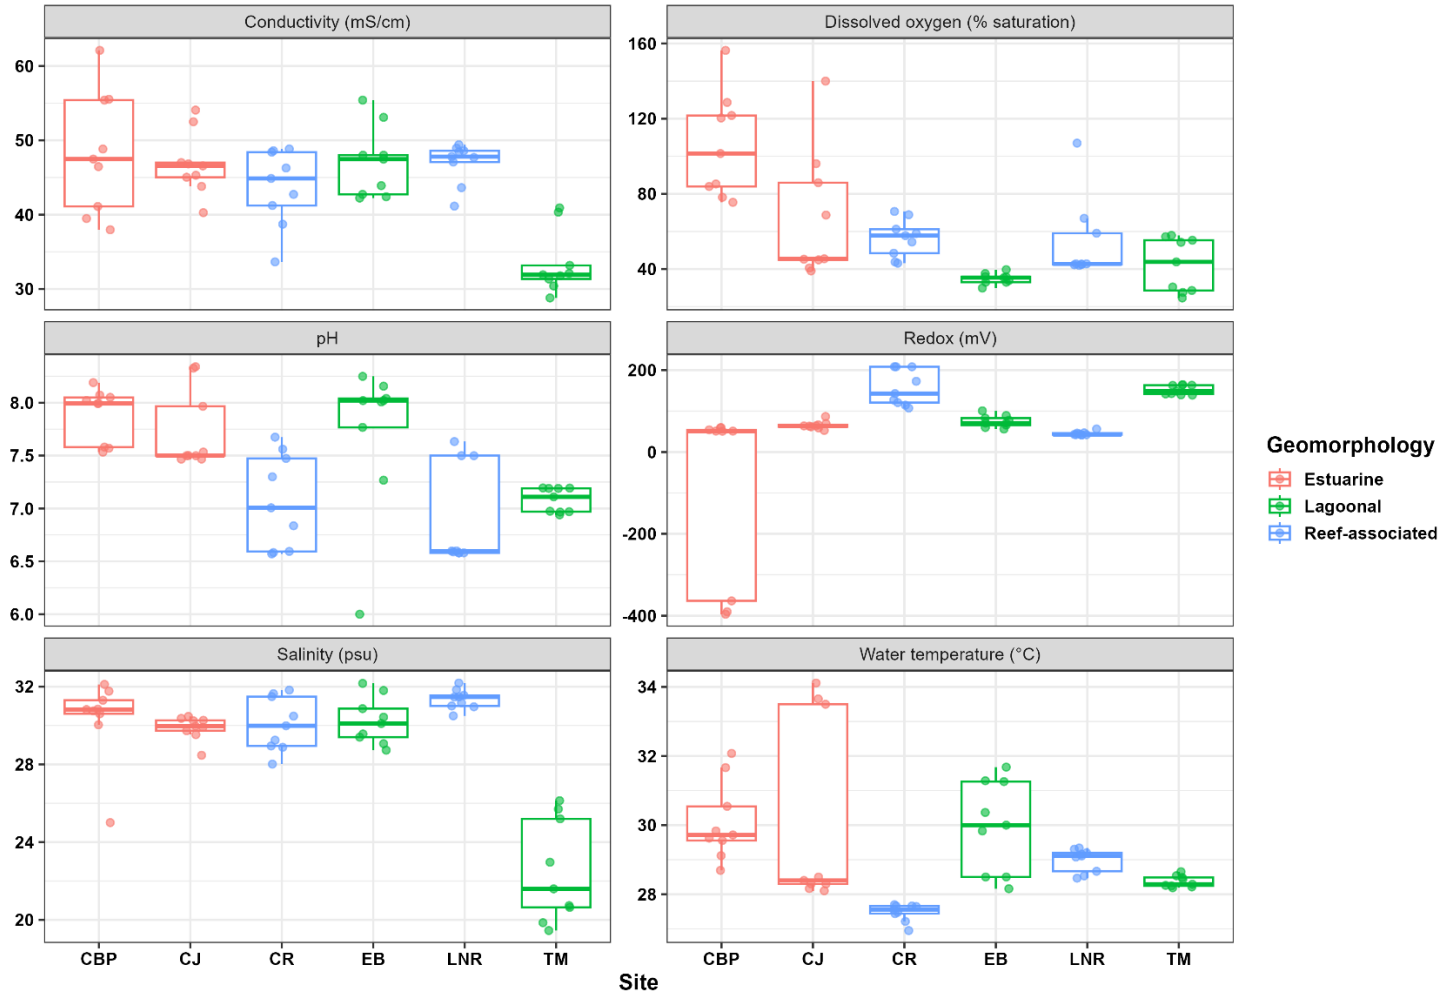

Figure S 2. Plot-level environmental parameters across sites (redox, pH, salinity, water temperature, dissolved oxygen, conductivity). Boxplots show distributions of plot means; points show plots colored by geomorphology.
